# Supplementary material
Source: Springer Nature journal article supplement (https://www.springermedizin.de/resource/supplementary/12874_2012_914_MOESM1_ESM.pdf/9433050)

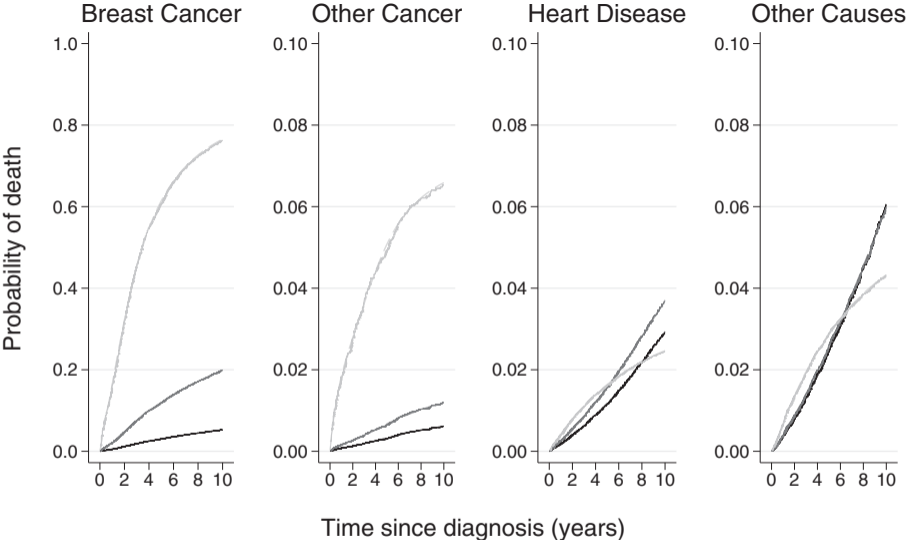

|       |                 |       |                |       |               |
|-------|-----------------|-------|----------------|-------|---------------|
| ----- | Localised(FPM)  | ----- | Regional (FPM) | ----- | Distant (FPM) |
| ————— | Localised (Cox) | ————— | Regional (Cox) | ————— | Distant (Cox) |

Supplement: MOESM1 [file 9433050]
